# Supplementary material for: Double burden or double counting of child malnutrition? The methodological and theoretical implications of stuntingoverweight in low and middle income countries
Source: PubMed Central journal article supplement (PMC5537509; doi:10.1136/jech-2017-209008), 2017-05-31
Supplement: jech-2017-209008supp001.pdf [file jech-2017-209008supp001.pdf]

**SUPPLEMENTARY MATERIAL**

**Supplementary Table 1: Standard Error (SE) and Upper Bound (UB) and Lower Bound (LB) of 95% Confidence Interval Estimates of AE Prevalence Rates[18,19]**

| Country                   | Year    | Stunting |      |      | Overweight |      |      | Stuntingoverweight |      |      |
|---------------------------|---------|----------|------|------|------------|------|------|--------------------|------|------|
|                           |         | SE       | LB   | UB   | SE         | LB   | UB   | SE                 | LB   | UB   |
| Albania                   | 2008-09 | 1.1      | 8.3  | 12.6 | 1.2        | 10.4 | 15.2 | 1.0                | 7.2  | 11.3 |
| Armenia                   | 2010    | 1.2      | 10.0 | 14.8 | 1.0        | 6.5  | 10.3 | 0.9                | 5.5  | 9.0  |
| Azerbaijan                | 2006    | 1.3      | 14.2 | 19.3 | 0.6        | 3.2  | 5.8  | 1.1                | 6.7  | 10.9 |
| Bangladesh                | 2011    | 0.8      | 38.9 | 42.1 | 0.1        | 0.6  | 1.2  | 0.1                | 0.5  | 0.9  |
| Barbados                  | 2012    | 1.2      | 3.6  | 8.6  | 1.8        | 7.6  | 14.6 | 0.7                | 0.8  | 3.9  |
| Belarus                   | 2005    | 0.5      | 2.6  | 4.5  | 0.6        | 7.7  | 9.9  | 0.2                | 0.7  | 1.4  |
| Belize                    | 2011    | 1.4      | 14.3 | 19.8 | 0.6        | 4.5  | 6.8  | 0.5                | 1.4  | 3.3  |
| Benin                     | 2006    | 0.6      | 34.9 | 37.2 | 0.1        | 2.1  | 2.6  | 0.4                | 6.1  | 7.7  |
| Bhutan                    | 2010    | 1.0      | 26.5 | 30.3 | 0.2        | 1.7  | 2.7  | 0.4                | 3.8  | 5.5  |
| BiH                       | 2011-12 | 0.6      | 2.2  | 4.8  | 1.2        | 11.3 | 15.9 | 0.7                | 2.7  | 5.7  |
| Bolivia                   | 2008    | 0.9      | 22.8 | 26.4 | 0.4        | 5.3  | 6.8  | 0.2                | 2.1  | 3.0  |
| Burkina Faso              | 2010    | 0.7      | 31.6 | 34.5 | 0.2        | 0.7  | 1.3  | 0.2                | 1.1  | 1.8  |
| Burundi                   | 2010    | 1.0      | 53.9 | 58.0 | 0.2        | 0.5  | 1.3  | 0.3                | 1.4  | 2.7  |
| Cambodia                  | 2010    | 1.1      | 35.9 | 40.4 | 0.2        | 0.4  | 1.1  | 0.2                | 0.6  | 1.5  |
| Cameroon                  | 2011    | 1.0      | 27.6 | 31.6 | 0.3        | 3.2  | 4.5  | 0.3                | 1.9  | 3.1  |
| Central African Republic  | 2006    | 1.0      | 35.8 | 39.5 | 0.4        | 2.7  | 4.1  | 0.4                | 4.2  | 5.9  |
| Chad                      | 2004    | 1.1      | 40.2 | 44.6 | 0.2        | 1.3  | 2.1  | 0.4                | 1.6  | 3.0  |
| Colombia                  | 2010    | 0.4      | 11.8 | 13.4 | 0.2        | 3.9  | 4.7  | 0.1                | 0.4  | 0.7  |
| Congo (Brazzaville)       | 2011-12 | 1.0      | 19.8 | 23.8 | 0.3        | 1.4  | 2.7  | 0.3                | 0.9  | 2.1  |
| Congo Democratic Republic | 2013-14 | 0.9      | 38.1 | 41.7 | 0.2        | 1.2  | 2.0  | 0.3                | 2.0  | 3.1  |
| Comoros                   | 2012    | 1.2      | 22.6 | 27.4 | 0.6        | 3.3  | 5.8  | 0.6                | 3.5  | 6.1  |
| Djibouti                  | 2006    | 1.5      | 23.4 | 29.4 | 0.8        | 4.0  | 7.1  | 0.9                | 5.6  | 9.3  |
| Dominican Republic        | 2013    | 1.7      | 5.9  | 12.9 | 0.6        | 1.2  | 3.5  | 0.3                | 0.2  | 1.7  |
| Egypt                     | 2014    | 0.5      | 13.0 | 14.9 | 0.3        | 6.7  | 8.0  | 0.4                | 6.8  | 8.4  |
| Ethiopia                  | 2011    | 0.9      | 41.7 | 45.2 | 0.1        | 0.7  | 1.2  | 0.1                | 0.6  | 1.2  |
| Gabon                     | 2012    | 1.6      | 13.8 | 19.9 | 0.8        | 3.2  | 6.5  | 0.5                | 1.3  | 3.2  |
| Gambia                    | 2005    | 0.7      | 25.1 | 28.0 | 0.2        | 1.3  | 1.9  | 0.2                | 0.8  | 1.4  |
| Georgia                   | 2005    | 0.8      | 5.5  | 8.5  | 1.0        | 12.2 | 16.0 | 0.8                | 5.2  | 8.3  |
| Ghana                     | 2008    | 1.2      | 22.8 | 27.4 | 0.4        | 2.1  | 3.7  | 0.4                | 1.7  | 3.4  |
| Guinea                    | 2012    | 1.1      | 27.2 | 31.5 | 0.3        | 1.5  | 2.7  | 0.3                | 1.1  | 2.3  |
| Guinea-Bissau             | 2006    | 1.0      | 33.9 | 37.7 | 0.3        | 2.8  | 4.0  | 0.6                | 10.6 | 12.8 |
| Guyana                    | 2009    | 1.6      | 13.8 | 19.9 | 0.8        | 3.2  | 6.5  | 0.5                | 1.3  | 3.2  |
| Haiti                     | 2012    | 1.0      | 17.8 | 21.8 | 0.3        | 2.0  | 3.3  | 0.2                | 0.8  | 1.6  |
| Honduras                  | 2011-12 | 0.7      | 20.5 | 23.1 | 0.3        | 4.1  | 5.3  | 0.1                | 0.4  | 0.8  |
| India                     | 2005    | 0.4      | 46.3 | 47.9 | 0.0        | 0.5  | 0.7  | 0.1                | 0.9  | 1.1  |
| Iraq                      | 2006    | 0.5      | 18.2 | 20.0 | 0.3        | 6.6  | 7.9  | 0.3                | 6.7  | 8.1  |
| Ivory Coast               | 2011    | 1.1      | 26.4 | 30.6 | 0.3        | 1.2  | 2.3  | 0.2                | 0.9  | 1.9  |
| Jordan                    | 2012    | 0.6      | 6.0  | 8.4  | 0.4        | 3.1  | 4.8  | 0.1                | 0.4  | 0.8  |
| Kazakhstan                | 2010-11 | 0.5      | 7.3  | 9.2  | 0.5        | 7.7  | 9.7  | 0.4                | 3.9  | 5.4  |
| Kenya                     | 2008-09 | 1.1      | 30.7 | 35.1 | 0.3        | 1.8  | 2.8  | 0.3                | 1.9  | 3.0  |
| Kyrgyzstan                | 2012    | 0.8      | 12.7 | 15.9 | 0.4        | 4.3  | 6.0  | 0.4                | 2.8  | 4.5  |
| Lao PDR                   | 2011-12 | 0.9      | 41.3 | 44.7 | 0.1        | 0.6  | 1.0  | 0.1                | 0.8  | 1.3  |
| Lesotho                   | 2009-10 | 1.6      | 26.7 | 32.9 | 0.7        | 3.9  | 6.8  | 0.5                | 1.9  | 3.9  |
| Liberia                   | 2013    | 1.1      | 26.7 | 31.2 | 0.3        | 1.0  | 2.3  | 0.3                | 0.9  | 2.0  |
| Madagascar                | 2003-04 | 1.6      | 45.8 | 52.0 | 0.2        | 0.9  | 1.9  | 0.6                | 3.1  | 5.4  |
| Malawi                    | 2010    | 1.0      | 40.1 | 43.9 | 0.3        | 2.5  | 3.8  | 0.4                | 4.3  | 5.9  |
| Maldives                  | 2009    | 1.0      | 14.9 | 18.8 | 0.5        | 3.7  | 5.7  | 0.3                | 0.8  | 1.8  |
| Mali                      | 2006    | 0.8      | 34.3 | 37.2 | 0.3        | 1.5  | 2.6  | 0.2                | 1.8  | 2.5  |
| Mauritania                | 2011    | 0.7      | 26.8 | 29.7 | 0.2        | 1.2  | 1.9  | 0.2                | 1.2  | 1.9  |
| Mongolia                  | 2010    | 0.7      | 11.8 | 14.6 | 0.6        | 7.6  | 10.1 | 0.3                | 1.5  | 2.6  |
| Montenegro                | 2013    | 0.4      | 0.8  | 2.6  | 1.5        | 13.7 | 19.5 | 1.4                | 3.5  | 9.1  |

|                            |         |     |      |      |     |      |      |     |      |      |
|----------------------------|---------|-----|------|------|-----|------|------|-----|------|------|
| <b>Morocco</b>             | 2003-04 | 0.7 | 15.6 | 18.5 | 0.4 | 6.9  | 8.5  | 0.4 | 4.8  | 6.2  |
| <b>Mozambique</b>          | 2011    | 0.8 | 36.7 | 39.7 | 0.2 | 2.5  | 3.2  | 0.4 | 4.0  | 5.4  |
| <b>Namibia</b>             | 2013    | 1.3 | 18.7 | 23.8 | 0.5 | 1.8  | 3.7  | 0.2 | 0.5  | 1.5  |
| <b>Nepal</b>               | 2011    | 1.4 | 36.8 | 42.5 | 0.2 | 0.4  | 1.3  | 0.2 | 0.4  | 1.2  |
| <b>Niger</b>               | 2012    | 1.0 | 39.9 | 43.9 | 0.2 | 0.8  | 1.5  | 0.2 | 1.0  | 1.8  |
| <b>Nigeria</b>             | 2013    | 0.6 | 32.9 | 35.3 | 0.1 | 1.1  | 1.5  | 0.2 | 2.3  | 2.9  |
| <b>Pakistan</b>            | 2012-13 | 1.4 | 39.3 | 44.9 | 0.2 | 0.6  | 1.5  | 0.3 | 1.7  | 3.1  |
| <b>Peru</b>                | 2012    | 0.6 | 16.1 | 18.6 | 0.4 | 6.0  | 7.8  | 0.1 | 0.3  | 0.7  |
| <b>Rwanda</b>              | 2010    | 0.9 | 38.7 | 42.2 | 0.3 | 2.8  | 4.0  | 0.3 | 3.0  | 4.2  |
| <b>Sao Tome e Principe</b> | 2008    | 1.6 | 20.7 | 26.9 | 0.7 | 3.9  | 6.8  | 0.7 | 4.4  | 7.4  |
| <b>Senegal</b>             | 2014    | 0.8 | 18.5 | 21.6 | 0.2 | 0.5  | 1.1  | 0.1 | 0.2  | 0.6  |
| <b>Serbia</b>              | 2010    | 0.6 | 2.1  | 4.5  | 0.9 | 11.0 | 14.4 | 0.5 | 2.3  | 4.1  |
| <b>Sierra Leone</b>        | 2013    | 1.0 | 31.5 | 35.5 | 0.4 | 2.7  | 4.2  | 0.4 | 3.6  | 5.2  |
| <b>Somalia</b>             | 2006    | 1.4 | 36.9 | 42.5 | 0.3 | 1.5  | 2.9  | 0.3 | 1.8  | 2.9  |
| <b>Suriname</b>            | 2010    | 0.7 | 11.8 | 14.6 | 0.6 | 7.6  | 10.1 | 0.3 | 1.5  | 2.6  |
| <b>Swaziland</b>           | 2010    | 1.1 | 25.8 | 30.2 | 0.6 | 6.8  | 9.1  | 0.4 | 2.2  | 3.6  |
| <b>Syria</b>               | 2006    | 0.5 | 15.9 | 17.9 | 0.3 | 6.5  | 7.8  | 0.5 | 10.0 | 11.8 |
| <b>Tajikistan</b>          | 2012    | 0.9 | 21.3 | 24.7 | 0.4 | 2.0  | 3.5  | 0.4 | 2.4  | 4.1  |
| <b>Tanzania</b>            | 2009-10 | 0.9 | 37.2 | 40.8 | 0.3 | 2.1  | 3.1  | 0.2 | 2.2  | 3.1  |
| <b>Thailand</b>            | 2005-06 | 0.7 | 12.4 | 15.2 | 0.3 | 5.5  | 6.8  | 0.2 | 1.6  | 2.3  |
| <b>Timor-Leste</b>         | 2009    | 0.8 | 52.5 | 55.6 | 0.1 | 0.8  | 1.4  | 0.3 | 3.0  | 4.2  |
| <b>Togo</b>                | 2010    | 1.0 | 27.4 | 31.5 | 0.3 | 0.8  | 2.0  | 0.1 | 0.1  | 0.5  |
| <b>Turkey</b>              | 2003-04 | 0.8 | 12.5 | 15.5 | 0.5 | 6.5  | 8.5  | 0.2 | 0.9  | 1.6  |
| <b>Uganda</b>              | 2011    | 1.3 | 28.9 | 34.1 | 0.3 | 1.4  | 2.7  | 0.3 | 1.2  | 2.5  |
| <b>Uzbekistan</b>          | 2006    | 0.6 | 13.5 | 16.0 | 0.5 | 7.0  | 9.0  | 0.4 | 3.6  | 5.0  |
| <b>Vanuatu</b>             | 2007    | 1.6 | 20.2 | 26.6 | 0.4 | 1.0  | 2.7  | 0.5 | 1.6  | 3.6  |
| <b>Zambia</b>              | 2013-14 | 0.7 | 35.4 | 37.9 | 0.2 | 2.2  | 2.9  | 0.2 | 2.9  | 3.8  |
| <b>Zimbabwe</b>            | 2010    | 0.8 | 27.6 | 30.6 | 0.3 | 2.7  | 3.9  | 0.2 | 1.6  | 2.5  |

**Supplementary Table 2: Exclusion Criteria of DHS/MICS (as noted in survey reports), JME and AEs.[21,22]**

Table 2 summarise exclusion criteria for the JME, AEs as well as the estimates in the Final Survey Reports of DHS and MICS (SREs). The SREs are used to triangulate and provide further insight into the estimate and sample size inconsistencies.

| <b>Criteria</b>                                     | <b>SREs</b>                       | <b>JMEs</b>                    | <b>AEs</b> |
|-----------------------------------------------------|-----------------------------------|--------------------------------|------------|
| <b>&gt;= 60 months*</b>                             | E                                 | E                              | E          |
| <b>Missing size at birth</b>                        | I                                 | <i>Not Indicated**</i>         | I          |
| <b>Missing Mother's BMI</b>                         | E                                 | <i>Not Indicated</i>           | I          |
| <b>Mother not listed in household roster</b>        | E                                 | <i>Not Indicated</i>           | I          |
| <b>Biologically implausible z-scores</b>            | E (from affected indicator(s))*** | E (from affected indicator(s)) | E          |
| <b>Missing one or more of height, weight or age</b> | E (from affected indicator(s))    | E (from affected indicator(s)) | E          |
| <b>Missing sampling weights</b>                     | I <sup>^</sup>                    | <i>Not Indicated</i>           | E          |

\*SRE for Honduras provided for 3-59 years, JMEs use age adjustment method to adjust national estimates in cases were age range is different, but there is no other matching criteria to re-analyse data

\*\**Not Indicated* – no indication in manuals or reports of inclusion or exclusion

\*\*\*Cases with any flagged cases or missing data are excluded from the affected indicator only

<sup>^</sup>SREs include cases missing sample weights, but not the number of unweighted cases in the reports

**Supplementary Table 3: MICS/DHS Final Survey Report Estimates (SREs) and Sample Size with Percentage Point (PP) and Sample Size Differences between SREs with JMEs and AEs[17,18,19,21,22]:**

| Country                                     | Year    | Survey Type | Survey Report Estimates (SRE) and Sample Size (n) |                 |                          | Difference in JMEs and Sample Size with Survey Reports |                         |                             | Difference in AEs and Sample Size with Survey Reports |                                         |               |
|---------------------------------------------|---------|-------------|---------------------------------------------------|-----------------|--------------------------|--------------------------------------------------------|-------------------------|-----------------------------|-------------------------------------------------------|-----------------------------------------|---------------|
|                                             |         |             | Stunting                                          | Over-weight     | n <sup>1</sup>           | Stunting $\Delta$ PP <sup>2</sup>                      | Over-weight $\Delta$ PP | JME $\Delta$ n <sup>3</sup> | AE Stunting <sup>4</sup> $\Delta$ PP                  | AE Over-weight <sup>4</sup> $\Delta$ PP | AE $\Delta$ n |
| <b>Albania</b>                              | 2008-09 | DHS         | 19.3                                              | 21.7            | 1289                     | 3.8                                                    | 1.7                     | 201                         | -0.1                                                  | 0                                       | 2             |
| <b>Armenia</b>                              | 2010    | DHS         | 19.3                                              | 15.3            | 1333                     | 1.5                                                    | 1.5                     | 68                          | -0.1                                                  | 0                                       | -4            |
| <b>Azerbaijan<sup>5</sup></b>               | 2006    | DHS         | 25.1                                              | 12.9            | 1979                     | 1.7                                                    | 1                       | 148                         | 0                                                     | -0.1                                    | -37           |
| <b>Bangladesh</b>                           | 2011    | DHS         | 41.3                                              | 1.5             | 7861                     | 0.1                                                    | 0.4                     | 209                         | -0.1                                                  | 0.1                                     | -214          |
| <b>Barbados</b>                             | 2012    | MICS        | 7.7                                               | 12.2            | 368                      | 0                                                      | 0                       | 35                          | -0.1                                                  | -1                                      | -9            |
| <b>Belarus<sup>5</sup></b>                  | 2005    | MICS        | 2.8                                               | 6.7             | 3018                     | 1.7                                                    | 3                       | 13                          | -0.1                                                  | 0.3                                     | -5            |
| <b>Belize</b>                               | 2011    | MICS        | 19.3                                              | 7.9             | 1780 (H/A)<br>1768 (W/H) | 0                                                      | 0                       | 29<br>41                    | 0.1                                                   | -0.1                                    | -5<br>7       |
| <b>Benin<sup>5</sup></b>                    | 2006    | DHS         | 43.1                                              | 9               | 13099                    | 1.6                                                    | 2.4                     | 1529                        | -0.2                                                  | 0.2                                     | -853          |
| <b>Bhutan</b>                               | 2010    | MICS        | 33.5                                              | 7.6             | 5863                     | 0.1                                                    | 0                       | 275                         | 0.1                                                   | -0.2                                    | -189          |
| <b>BiH</b>                                  | 2011-12 | MICS        | 8.9                                               | 17.4            | 2137 (H/A)<br>2078 (W/H) | 0                                                      | 0                       | 64<br>103                   | 0                                                     | -0.6                                    | 50<br>-9      |
| <b>Bolivia</b>                              | 2008    | DHS         | 27.1                                              | 8.5             | 8422                     | 0.1                                                    | 0.2                     | 105                         | 0                                                     | 0                                       | -706          |
| <b>Burkina Faso</b>                         | 2010    | DHS         | 34.6                                              | 2.4             | 6994                     | 0.5                                                    | 0.4                     | 222                         | -0.1                                                  | 0                                       | -462          |
| <b>Burundi</b>                              | 2010    | DHS         | 57.7                                              | 2.7             | 3590                     | -0.2                                                   | 0.2                     | 54                          | 0.2                                                   | 0                                       | -140          |
| <b>Cambodia</b>                             | 2010    | DHS         | 39.9                                              | 1.6             | 3975                     | 1                                                      | 0.3                     | 102                         | -0.8                                                  | 0.1                                     | -276          |
| <b>Cameroon</b>                             | 2011    | DHS         | 32.5                                              | 6.2             | 5860                     | 0.1                                                    | 0.3                     | 246                         | -0.5                                                  | 0                                       | -827          |
| <b>Central African Republic<sup>5</sup></b> | 2006    | MICS        | 37.5                                              | 4.7             | 5873                     | 7.6                                                    | 3.8                     | 2714                        | 0.5                                                   | 1.3                                     | 1317          |
| <b>Chad<sup>5</sup></b>                     | 2004    | DHS         | 40.9                                              | NR <sup>6</sup> | 4635                     | 3.9                                                    | -                       | 253                         | 3.7                                                   | -                                       | -251          |
| <b>Colombia</b>                             | 2010    | DHS         | 13.2                                              | 4.8             | 15702                    | -0.5                                                   | 0                       | 119                         | -0.1                                                  | 0                                       | 267           |
| <b>Comoros</b>                              | 2012    | DHS         | 30.1                                              | 9.3             | 2762                     | 2.0                                                    | 1.6                     | 357                         | -0.2                                                  | -0.5                                    | -375          |
| <b>Congo (Brazzaville)</b>                  | 2011-12 | DHS         | 24.4                                              | 3.3             | 4951                     | 0.6                                                    | 0.3                     | -304                        | -1.3                                                  | 0                                       | -476          |
| <b>Congo Democratic Republic</b>            | 2013-14 | DHS         | 42.7                                              | 4.1             | 9030                     | -0.1                                                   | 0.3                     | 365                         | -0.4                                                  | -0.1                                    | -971          |
| <b>Djibouti<sup>5</sup></b>                 | 2006    | MICS        | 32.6                                              | 10.2            | 1761                     | 0                                                      | 3.2                     | 411                         | -2.3                                                  | 0.2                                     | -54           |
| <b>Dominican Republic</b>                   | 2013    | DHS         | 6.9                                               | 7.3             | 3619                     | 0.2                                                    | 0.3                     | 72                          | -0.1                                                  | 0.2                                     | -432          |
| <b>Egypt</b>                                | 2014    | DHS         | 21.4                                              | 14.9            | 13601                    | 0.9                                                    | 0.8                     | 1303                        | 0.1                                                   | 0                                       | 81            |
| <b>Ethiopia</b>                             | 2011    | DHS         | 44.4                                              | 1.7             | 10282                    | -0.2                                                   | 0.1                     | 892                         | -0.1                                                  | 0.1                                     | -671          |
| <b>Gabon</b>                                | 2012    | DHS         | 16.5                                              | 7.4             | 3856                     | 1                                                      | 0.3                     | 175                         | -0.5                                                  | 0.1                                     | -520          |
| <b>Gambia<sup>5</sup></b>                   | 2005    | MICS        | 22.4                                              | 2.3             | 6386                     | 5.2                                                    | 0.4                     | 38                          | 0                                                     | 0                                       | -31           |
| <b>Georgia<sup>5</sup></b>                  | 2005    | MICS        | 10.4                                              | 15.2            | 1812                     | 4.3                                                    | 5.8                     | 112                         | 1.4                                                   | 1.3                                     | 2             |

|                                  |         |      |      |      |                          |      |      |       |      |      |       |
|----------------------------------|---------|------|------|------|--------------------------|------|------|-------|------|------|-------|
| <b>Ghana</b>                     | 2008    | DHS  | 28   | 5.3  | 2525                     | 0.6  | 0.6  | 141   | -0.5 | -0.1 | -146  |
| <b>Guinea</b>                    | 2012    | DHS  | 31.2 | 3.6  | 3531                     | 0.1  | 0.2  | 151   | -0.3 | 0    | -446  |
| <b>Guinea-Bissau<sup>5</sup></b> | 2006    | MICS | 40.9 | 8.5  | 4325                     | 6.8  | 8.5  | 965   | 1    | 2.8  | 47    |
| <b>Guyana</b>                    | 2009    | DHS  | 18.2 | 6.2  | 1522                     | 1.3  | 0.5  | 129   | 0.5  | 0.5  | 38    |
| <b>Haiti</b>                     | 2012    | DHS  | 21.9 | 3.6  | 4529                     | 0    | 0    | 52    | -1   | 0.1  | -545  |
| <b>Honduras</b>                  | 2011-12 | DHS  | 22.6 | 5.1  | 10167 <sup>7</sup>       | 0.1  | 0.1  | 52    | -0.3 | 0.2  | -194  |
| <b>India<sup>5</sup></b>         | 2005    | DHS  | 48   | 1.5  | 46655                    | -0.1 | 0.4  | 2578  | 0    | 0    | -5349 |
| <b>Iraq<sup>5</sup></b>          | 2006    | MICS | 21.4 | 9.4  | 15316                    | 6.1  | 5.6  | 993   | 1.4  | 1.9  | 170   |
| <b>Ivory Coast</b>               | 2011    | DHS  | 29.8 | 3    | 3581                     | -0.2 | 0.2  | 163   | 0    | -0.1 | -381  |
| <b>Jordan</b>                    | 2012    | DHS  | 7.7  | 4.4  | 5851                     | 0.1  | 0.3  | 52    | -0.1 | 0    | 416   |
| <b>Kazakhstan</b>                | 2010-11 | MICS | 13   | 0.6  | 4987 (H/A)<br>4955 (W/H) | 0.1  | 12.7 | 28    | 0.2  | 12.6 | 3     |
| <b>Kenya</b>                     | 2008-09 | DHS  | 35.3 | 4.7  | 5470                     | -0.1 | 0.3  | 256   | -0.1 | 0    | -374  |
| <b>Kyrgyzstan</b>                | 2012    | DHS  | 17.7 | 8.5  | 4337                     | 0.1  | 0.5  | 52    | 0.1  | 0.1  | -321  |
| <b>Lao PDR</b>                   | 2011-12 | MICS | 44.2 | 2    | 10671                    | -0.4 | 0    | 155   | -0.3 | 0    | -122  |
| <b>Lesotho</b>                   | 2009-10 | DHS  | 39.2 | 7.2  | 2086                     | -0.2 | 0.1  | 53    | -1.6 | 0.4  | -774  |
| <b>Liberia</b>                   | 2013    | DHS  | 31.6 | 2.9  | 3520                     | 0.5  | 0.3  | 100   | -1.4 | 0    | -349  |
| <b>Madagascar<sup>5</sup></b>    | 2003-04 | DHS  | 50.1 | NR   | 5412                     | 2.7  | -    | 493   | -1.2 | -    | -978  |
| <b>Malawi</b>                    | 2010    | DHS  | 47.1 | 8.3  | 4849                     | 0.7  | 0.9  | 266   | 0    | -0.1 | -263  |
| <b>Maldives</b>                  | 2009    | DHS  | 18.9 | 5.9  | 2513                     | 1.4  | 0.6  | 102   | -0.9 | -0.1 | -160  |
| <b>Mali<sup>5</sup></b>          | 2006    | DHS  | 37.7 | NR   | 11877                    | 0.8  | -    | 893   | 0.2  | -    | -1099 |
| <b>Mauritania</b>                | 2011    | MICS | 29.7 | 3.2  | 8668                     | 0    | 0    | -144  | -1.3 | 0    | -492  |
| <b>Mongolia</b>                  | 2010    | MICS | 15.3 | 10.9 | 3672                     | 0.3  | -6.2 | -2967 | -0.2 | -0.2 | -13   |
| <b>Montenegro<sup>8</sup></b>    | 2013    | MICS | 9.4  | 22.3 | 1361 (H/A)<br>1300 (W/H) | 0    | 0    | 31    | 0.3  | -1.1 | -47   |
| <b>Morocco<sup>5</sup></b>       | 2003-04 | DHS  | 22.4 | NR   | 5311                     | 0.7  | -    | 310   | 0.1  | -    | 66    |
| <b>Mozambique</b>                | 2011    | DHS  | 42.6 | 7.4  | 10313                    | 0.5  | 0.5  | 478   | 0.2  | 0    | -1000 |
| <b>Namibia</b>                   | 2013    | DHS  | 23.8 | 3.4  | 2287                     | -0.7 | 0.7  | 343   | -1.8 | 0.1  | -729  |
| <b>Nepal</b>                     | 2011    | DHS  | 40.5 | 1.4  | 2475                     | 0    | 0.1  | 40    | -0.2 | 0    | -140  |
| <b>Niger</b>                     | 2012    | DHS  | 43.9 | 3.5  | 5481                     | -0.9 | -0.5 | 354   | -0.7 | -1.1 | -710  |
| <b>Nigeria</b>                   | 2013    | DHS  | 36.8 | 4    | 26190                    | -0.4 | 0.9  | 2602  | -0.1 | -0.1 | -1685 |
| <b>Pakistan</b>                  | 2012-13 | DHS  | 44.8 | 3.2  | 3466                     | 0.2  | 1.6  | 349   | -0.4 | 0.1  | -395  |
| <b>Peru</b>                      | 2012    | DHS  | 18.1 | NR   | 9168                     | 0.3  | -    | 20    | -0.3 | -    | 45    |
| <b>Rwanda</b>                    | 2010    | DHS  | 44.2 | 6.7  | 4356                     | 0.1  | 0.4  | 63    | -0.2 | 0.2  | -281  |
| <b>Sao Tome e Principe</b>       | 2008    | DHS  | 29.3 | 10.5 | 1544                     | 2.3  | 1.1  | 191   | 0.1  | 0.4  | -90   |
| <b>Senegal</b>                   | 2014    | DHS  | 18.7 | 1.2  | 5934                     | 0.7  | 0.1  | 106   | 1.6  | -0.2 | 157   |
| <b>Serbia<sup>8</sup></b>        | 2010    | MICS | 6.6  | 15.6 | 2745 (H/A)<br>2699 (W/H) | 0    | 0    | 59    | 0    | -0.3 | -87   |
| <b>Sierra Leone</b>              | 2013    | DHS  | 37.9 | 7.5  | 5094                     | 0    | 1.4  | 677   | -0.1 | 0.2  | -1025 |

|                               |         |      |      |      |                   |      |     |      |      |      |      |
|-------------------------------|---------|------|------|------|-------------------|------|-----|------|------|------|------|
| <b>Somalia<sup>5</sup></b>    | 2006    | MICS | 37.8 | 3.2  | 5424              | 4.3  | 1.5 | 419  | 0    | 0.3  | -65  |
| <b>Suriname</b>               | 2010    | MICS | 8.8  | 4    | 2726              | 0    | 0   | 153  | 6.3  | 6.7  | 933  |
| <b>Swaziland</b>              | 2010    | MICS | 30.9 | 10.7 | 2562 (H/A)        | 0.1  | 0   | 14   | 0    | 0    | -13  |
|                               |         |      |      |      | 2560 (W/H)        |      |     | 16   |      |      | -11  |
| <b>Syria<sup>5</sup></b>      | 2006    | MICS | 22.4 | 12.4 | 9578              | 6.2  | 6.3 | 1009 | 2.1  | 2.5  | 180  |
| <b>Tajikistan</b>             | 2012    | DHS  | 26.2 | 5.9  | 5080              | 0.6  | 0.7 | 261  | -0.1 | -0.1 | -557 |
| <b>Tanzania</b>               | 2009-10 | DHS  | 42   | 5    | 7491              | 0.5  | 0.5 | 161  | -0.4 | 0.2  | -699 |
| <b>Thailand</b>               | 2005-06 | MICS | 11.9 | 6.9  | 9409 <sup>9</sup> | 3.8  | 1.1 | 353  | 0.1  | 0.1  | 426  |
| <b>Timor-Leste</b>            | 2009    | DHS  | 58.1 | 4.7  | 8171              | -0.4 | 1.1 | 666  | -0.5 | -0.1 | -627 |
| <b>Togo</b>                   | 2010    | MICS | 29.7 | 1.6  | 4668              | 0.1  | 0   | 11   | 0    | 0    | -43  |
| <b>Turkey<sup>5</sup></b>     | 2003-04 | DHS  | 12.2 | NR   | 3668              | 3.4  | -   | 109  | 2.9  | -    | 358  |
| <b>Uganda</b>                 | 2011    | DHS  | 33.4 | 3.4  | 2350              | 0.3  | 0.4 | 98   | -0.2 | 0.3  | -280 |
| <b>Uzbekistan<sup>5</sup></b> | 2006    | MICS | 14.6 | 7.3  | 4691              | 5    | 5.5 | 192  | 1    | 1.2  | -8   |
| <b>Vanuatu</b>                | 2007    | MICS | 20.1 | 2.3  | 1281              | 5.8  | 2.4 | 77   | 0.4  | 0.6  | -81  |
| <b>Zambia</b>                 | 2013-14 | DHS  | 40.1 | 5.7  | 12328             | -0.1 | 0.5 | 429  | -0.1 | 0.2  | -921 |
| <b>Zimbabwe</b>               | 2010    | DHS  | 32   | 5.5  | 5260              | 0.3  | 0.3 | 178  | -0.9 | -0.2 | -961 |

<sup>1</sup>Where different sample sizes were noted for either height-for-age (stunting) or weight-for-height (overweight) they indicator specific sample size is indicated by (H/A) or (W/H) respectively

<sup>2</sup>( $\Delta$  PP) differences in percentage points between SREs and JMEs/AEs respectively. Positive values indicate the JME/AE rates for stunting and overweight are higher than the SREs and negative values vice versa.

<sup>3</sup>( $\Delta$  n) differences in reported sample size for generation of prevalence rates between SREs and JMEs/AEs respectively. Positive values indicate the JME/AE sample size for stunting and overweight are higher than the SREs and negative values vice versa.

<sup>4</sup>Estimates include stunted/overweight children

<sup>5</sup>SREs used NCHS not WHO 2006 Child Growth Standards, this is likely to skew understanding of differences in estimates between SREs and AEs/JMEs.

<sup>6</sup>Overweight estimates not reported survey report, difference in sample sizes could thus not be estimated

<sup>7</sup>Survey reports indices and sample for 3-59 months only

<sup>8</sup>JME reports the sample size for weight-for-age as listed in the MICS Final Reports for Montenegro and Serbia. The sample sizes differ for height-for-age and weight-for-height and suggests an error in the JME.

<sup>9</sup>n for all under-fives in dataset, no indication in survey report of final sample size (after exclusion/cleaning) for these estimates, it only lists the weighted population size of 4632212

Other potential sources of the estimate inconsistencies include: 1) error in use/reporting of data, 2) differential application of sampling weights. There remains an issue of transparency in the use of data, and it is not possible to ascertain the consistency of weighting strategies across the three groups of estimates (SREs, JMEs and AEs). Sampling procedures are described in each survey's final reports, yet how the weights for JME or DHS/MICs estimates were finally applied are not currently made publicly available for either the SREs or JMEs. It should be noted that is not possible to verify whether there was incorrect use or reporting of data in the JME or that the exclusion criteria for the JME was applied as described, as this information is also not publicly available.
